# Supplementary material for: A comparative DFT study of HCHO decomposition on different terminations of the Co3O4(110) surface
Source: Royal Society of Chemistry journal article supplement (doi:10.1039/d4dt01068j), 2024-01-01
Supplement: d4dt01068j1.pdf [file d4dt01068j1.pdf]

## Supporting Information

For

### **A comparative DFT study of HCHO decomposition on different terminations of the $\text{Co}_3\text{O}_4$ (110) surface**

Xing Wang, Gbemi Abass, Jiajia Wang\*, Dan Song\*, Aibin Ma

*College of Materials Science and Engineering, Hohai University, Nanjing 210098, P.*

*R. of China.*

\*Corresponding authors Tel: +86-25-83787239, Fax: +86-25-83786046

E-mail: xcrysdn@163.com (Jiajia Wang) or songdancharls@hhu.edu.cn (Dan Song)

## Surface phase diagram calculation method

The surface energy is calculated by:

$$E_{surf} = \frac{1}{2A} (E^{slab} - N_O \mu_O - N_H \mu_H - N_{Co} \mu_{Co}) \quad (S1)$$

where  $E^{slab}$  is the total energy of the slab model,  $N_i$  and  $\mu_i$  ( $i=O, H, Co$ ) are the number and chemical potential of the constituent  $i$ , respectively. In Eqn. (S1), the chemical potential of  $\mu_O$ ,  $\mu_H$  and  $\mu_{Co}$  have the following relationships:

$$\mu_O = \frac{1}{2} \mu_{O_2}(g) \quad (S2)$$

$$\mu_H = \frac{1}{2} \mu_{H_2}(g) = \frac{1}{2} [\mu_{H_2O}(g) - \mu_O] = \frac{1}{2} \mu_{H_2}(g) - \frac{1}{4} \mu_{O_2}(g) \quad (S3)$$

$$4\mu_O + 3\mu_{Co} = E^{bulk} \quad (S4)$$

where  $\mu_i(g)$  ( $i=O_2, H_2, H_2O$ ) is the chemical potential of corresponding gas, and  $E^{bulk}$  is the total energy of the bulk  $Co_3O_4$ . Then based on the above Eqn. (S2-S4), the Eqn. (S2) can be re-written as:

$$E_{surf} = \frac{1}{2A} \left[ E^{slab} - \frac{1}{2} N_H \mu_{H_2O}(g) + \frac{1}{2} \left( \frac{1}{2} N_H + \frac{4}{3} N_{Co} - N_O \right) \mu_{O_2}(g) - \frac{1}{3} N_{Co} E^{bulk} \right] \quad (S5)$$

It is seen that, in the Eqn. (S5), the surface energy is only dependent on the  $\mu_{H_2O}(g)$  and  $\mu_{O_2}(g)$ , which can be calculated by:

$$\mu_{H_2O}(g) = E_{H_2O}(g)^{DFT} + E_{H_2O}(g)^{ZPE} + \Delta G_{H_2O}(g)^0(T) + k_B T \ln \left( \frac{p_{H_2O}}{p^0} \right) \quad (S6)$$

$$\mu_{O_2}(g) = E_{O_2}(g)^{DFT} + E_{O_2}(g)^{ZPE} + \Delta G_{O_2}(g)^0(T) + k_B T \ln \left( \frac{p_{O_2}}{p^0} \right) \quad (S7)$$

Where  $E_{H_2O}(g)^{DFT}$  and  $E_{O_2}(g)^{DFT}$  are DFT calculated electronic energies of the  $H_2O$  and  $O_2$  gases, respectively, and  $E_{H_2O}(g)^{ZPE}$  and  $E_{O_2}(g)^{ZPE}$  are the corresponding zero-point energy corrections. The four terms represent the Gibbs free energies at 0K. The  $\Delta G_{H_2O}(g)^0(T)$

and  $\Delta G_{O_2(g)}^0(T)$  are obtained from thermodynamic tables.  $k_B$  is the Boltzmann constant.  $p^0$  is ambient pressure ( $1.01 \times 10^5$  Pa) and  $T = 298.15$  K. For the simplicity purpose, we did not consider the variation of  $H_2O$  pressure and only set the  $H_2O$  pressure at the ambient pressure ( $p_{H_2O} = 1.01 \times 10^5$  Pa) during all calculations. According to Eqn. (S7), we can obtain a corresponding  $\mu_{O_2(g)}$  with the variation of  $O_2$  gas pressure ( $p_{O_2}$ ). Then, we define a chemical penitential difference  $\Delta\mu_O$  which can be expressed as:

$$\Delta\mu_O = \mu_O - \frac{1}{2} [E_{O_2(g)}^{DFT} + E_{O_2(g)}^{ZPE}] \quad (S8)$$

Based on Eqn. (S2) and (S7), the Eqn. (S8) can be re-written as:

$$\Delta\mu_O = \mu_O - \frac{1}{2} [E_{O_2(g)}^{DFT} + E_{O_2(g)}^{ZPE}] = \frac{1}{2} \left[ \Delta G_{O_2(g)}^0(T) + k_B T \ln \left( \frac{p_{O_2}}{p^0} \right) \right] \quad (S9)$$

Then, both the  $O_2$  gas pressure ( $p_{O_2}$ ) and chemical penitential difference  $\Delta\mu_O$  can appear as horizontal axis in the in the surface phase diagram. More calculation details can be found in (*J. Phys. Chem. C* 2015, 119, 9973-9979) and (*Catal. Sci. Technol.* 2014, 4, 3379-3389).
